# Supplementary material
Source: ML conference proceedings conference paper supplement (https://openreview.net/forum?id=iYZkvCji36L)
Supplement: supplementary_material [file attachment]

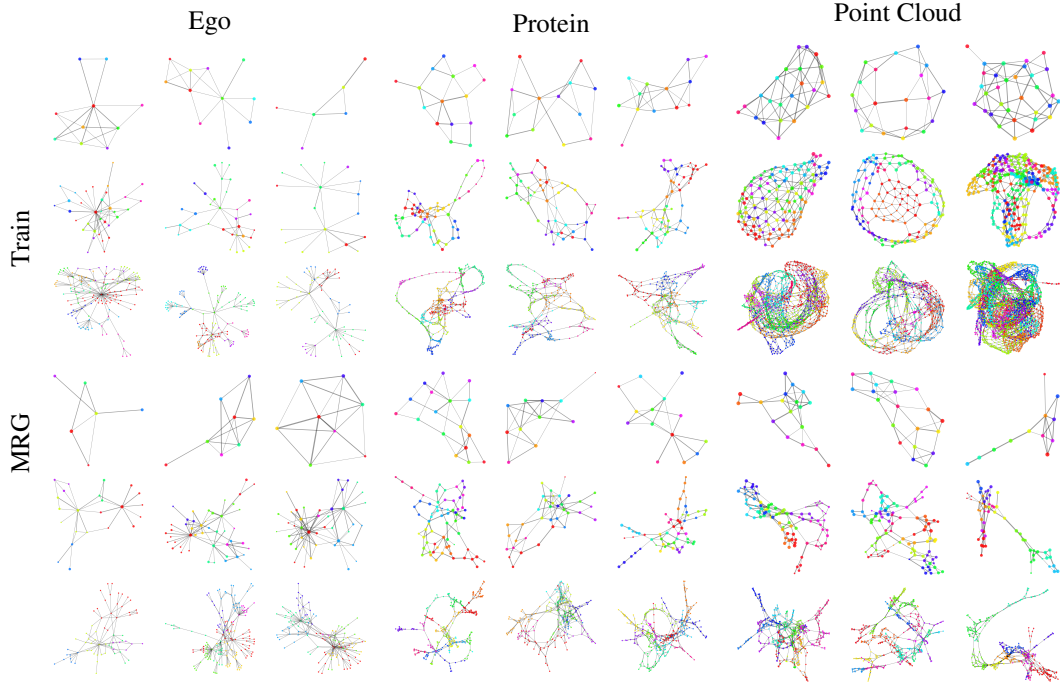

Figure 4: Sample graphs generated by different models.

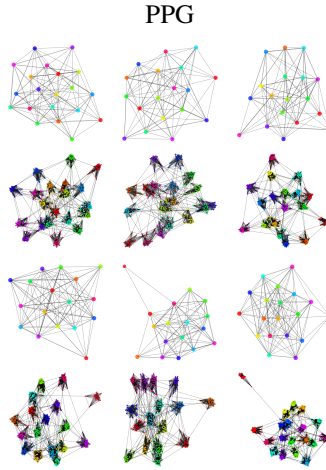

## A GENERATED SAMPLES

Generated hierarchical graphs sampled MRG models are presented in this section.
